1           **Assessment of Magnitude of Transfusion Transmissible Infections and**  
2           **Associated Factors among Blood Donors at Woliso Blood Bank, South-West**  
3           **Shewa Zone, Oromia, Ethiopia: Across-Sectional Study**

4 Alemnesh W/Amlak<sup>1¶</sup>, Habtamu Oljira<sup>2¶</sup>, Belay Tafa<sup>2¶</sup>, Samuel Demissie Darcho<sup>3\*</sup>, Sisay Dabi  
5 Begna<sup>1</sup>

6 <sup>1</sup> Department of public health, College of Medicine and Health Sciences, Ambo University,  
7 Ethiopia

8 <sup>2</sup> Woliso Blood Banks, Woliso town administration, Oromia, Ethiopia,

9 <sup>3</sup> School of Public Health, College of Health and Medical Sciences, Haramaya University, Harar,  
10 Ethiopia,

11 Email: [aleminesh19@gmail.com](mailto:aleminesh19@gmail.com), [oljirah@gmail.com](mailto:oljirah@gmail.com), [belaytf@gmail.com](mailto:belaytf@gmail.com),  
12 [samidemissie3@gmail.com](mailto:samidemissie3@gmail.com), [sisaydhbegna@gmail.com](mailto:sisaydhbegna@gmail.com) ,

13    \* **Corresponding author**

14 Samuel Demissie Darcho

15 School of public health, College of Health and Medical Sciences, Haramaya University, Harar  
16 P.O. Box, 235, Ethiopia

17 Email: [samidemissie3@gmail.com](mailto:samidemissie3@gmail.com),

18

19

20

21

## 22 **Abstract**

23 **Background:** Blood transfusion is an effective treatment for saving millions of lives, even  
24 though transfusion-transmissible infections are the major problem. The prevalence of  
25 transfusion-transmissible infections varies across different geographical populations. This study  
26 aims to assess the prevalence of transfusion-transmissible infections and associated factors  
27 among blood donors at Woliso Blood Bank, South-West Shewa Zone, Oromia, Ethiopia.

28 **Method:** An institutional-based cross-sectional study design was conducted. A structured and  
29 pretested questionnaire was used to collect data through a face-to-face interview. Data was  
30 entered into Epi Data version 3.1, and it was exported to STATA version 17.0 for data cleaning  
31 and analysis. A binary logistic regression analysis was carried out to identify factors associated  
32 with outcome variables. Accordingly, variables that fulfilled p-values  $<0.25$  on the bivariate  
33 logistic regression were considered candidates for multivariate logistic regression to control for  
34 possible confounders. The odds ratios along with the 95% confidence interval were used to  
35 present the finding, and statistical significance was reported at a p-value of 0.05.

36 **Results:** The overall prevalence of transfusion-transmissible infections was 9.5% (95% CI: 6.3–  
37 12.9%). Participants with no formal education [AOR=4.84; 95% CI= 1.09, 21.46], unprotected  
38 sexual intercourse with multiple partners [AOR=4.77; 95% CI= 1.38, 16.44], and participants  
39 with less frequency of blood donation [AOR=2.85; 95% CI: 1.16, 6.99] were significantly  
40 associated with transfusion transmissible infections.

41 **Conclusion:** The prevalence of transfusion-transmissible infections was high in this study area.  
42 Educational level, unprotected sexual intercourse with more partners, and a number of blood  
43 donations were found to be independent predictors of transfusion-transmitted infections. Blood  
44 banks and regional health bureaus should work on community mobilization and enhancing health  
45 promotion through prevention and control by considering the identified associated factors.

46 **Keywords:** Associated factors, Blood bank, blood donor, Transfusion Transmissible infections,  
47 south west Shewa, Woliso

48

49

50

## 51 **Introduction**

52 Transfusions of blood are a vital component of medical care that saves lives and enhances the  
53 quality of life for millions of people worldwide. Blood transfusions are most commonly used to  
54 treat patients who have had trauma, emergencies, disasters, or accidents; children with severe  
55 anemia from malaria or malnutrition; and women who are bleeding during pregnancy or  
56 childbirth. It is also used to support complicated medical and surgical operations like transplants  
57 and cardiovascular surgery in nations with contemporary healthcare systems. Adequate health  
58 care requires timely and universal access to safe blood and blood products, as well as the  
59 appropriate use of these resources (1).

60 Our society places a high priority on transfusion safety, and clinical trials are being conducted to  
61 find ways to reduce the risk of known and emerging illnesses in all blood products. Using  
62 pathogen reduction methods, the risk of infection from bacterial and viral pathogens can be  
63 effectively reduced (2). Blood grouping and compatibility testing, safe blood collection  
64 procedures, accurate testing for transfusion-transmissible infections, recruiting and retention of  
65 low-risk blood donors, and appropriate use and safe administration of blood are all factors that  
66 contribute to blood safety (3).

67 A 100% voluntary, unpaid blood donation program requires blood donors to be recruited through  
68 efficient procedures, community education, communication tactics, and effective research.  
69 Additional key elements are standardized procedures for donor selection, quality of blood  
70 collection, counselling donors to ensure their health and safety, encourage repeat donations,  
71 donor follow-up, and retention strategies to maintain a stable base of safe voluntary blood donors  
72 who give blood regularly (4).

73 In Ethiopia, there are currently 43 blood banks, one central national blood bank (NBB), and  
74 forty-two operational regional blood banks, with at least one in each of the country's  
75 administrative regions so that Woliso blood bank is one of the 10 BB in Oromia region (5).

76

77 A number of serious public health issues still affect blood donors, including syphilis, hepatitis B,  
78 hepatitis C, and HIV. The World Health Organization (WHO) states that screening for syphilis,  
79 HBV, HCV, and HIV should be done on all blood donors. The frequency of TTIs has  
80 significantly decreased as a result of the WHO's introduction of stringent donor screening  
81 protocols for blood-borne diseases (6).

82 Blood shortages and contaminated blood are the two most important problems associated with  
83 blood transfusions in the developing world, especially in Africa. These problems all too often  
84 result in severe health consequences like postpartum hemorrhage deaths or the spread of  
85 potentially fatal infections like HIV and hepatitis. It would be possible to avoid these damaging  
86 effects on health by taking steps to increase blood availability and safety (7). HIV, HBV, and  
87 HCV are very concerning due to their prolonged viremia and carrier or latent states.  
88 Additionally, they may result in fatal, persistent, or life-threatening diseases. Because infectious  
89 indicators are so common among blood donors in developing nations, blood safety remains a  
90 serious issue (8).

91 The absence of procedures and infrastructure for ensuring a safe blood supply increases the  
92 danger of infection spread by transfusion in many countries. These problems include a shortage  
93 of knowledgeable staff, inconsistent test kit supplies or the use of low-quality test kits, an  
94 unstable supply chain, and inadequate cold chain facilities. A fragmented blood supply system,  
95 with varied technical standards and no central monitoring, can further jeopardize safety measures  
96 (4).

97 The World Health Organization (WHO) has established a goal of enhancing regional blood  
98 safety by 2012 by strengthening organization and management, blood donor recruitment and  
99 collection, donor blood testing, and appropriate clinical blood usage (9). Hepatitis viruses infect  
100 approximately 2.3 billion individuals worldwide, resulting in roughly 1.4 million fatalities, 90%  
101 of which are caused by hepatitis B and C viruses. As a result, chronic hepatitis infections have  
102 raised mortality rates and represent a significant burden on healthcare systems in many countries,  
103 including Ethiopia. HBV infects one-third of the world's population (more than two billion  
104 people), posing a severe health threat (10).

105 The World Health Organization (WHO) announced a policy in 2016 to eliminate viral hepatitis  
106 by 2030. Africa, particularly Sub-Saharan Africa, bears a large share of the global burden of viral  
107 hepatitis, particularly chronic hepatitis B and C virus infections. Major developments in the  
108 management of hepatitis C have put elimination within reach, but several difficulties will need to  
109 be navigated on the path to elimination. Many of the challenges faced are unique to sub-Saharan  
110 Africa and the development of strategies is complicated by a scarcity of good data from countries  
111 and regions within sub-Saharan Africa(11).

112 In developed countries, prevention of TTIs has been achieved by reducing unnecessary  
113 transfusions, using only regularly-screened volunteer donors, excluding donors with risk factors  
114 and screening of all donated blood for infection. In many developing nations, however, none of  
115 these measures are implemented consistently, and the risk of TTIs remains high (12). At the  
116 national blood bank in Ethiopia, the prevalence of the major TTIs (Hepatitis B Virus=5.23 %,  
117 HIV=2.29 %, and Hepatitis C Virus=2.30 %) is high. As a result, regular monitoring of the  
118 amount of transfusion transmissible infections in blood donors is critical to prevent infectious  
119 disease transmission(7).

120 The prevalence of infection or the proportion of blood donations with a positive result is directly  
121 related to the safety of the blood supply because this has an impact on the residual risk of blood  
122 products used for patient care and also on the risk due to errors in blood quarantine and release  
123 (even though test-positive donations are discarded). So that the prevalence of an infection in  
124 blood donations is dependent on the prevalence of the infection in the population from which  
125 donors are selected and on the effectiveness of donor motivation, mobilization and selection  
126 processes(13).

127 Transfusion transmittable infections among blood donors are the subject of limited  
128 epidemiological investigations in Ethiopia (14). Majority of the studies from Ethiopia focused on  
129 secondary data analysis /trend analysis of TTIs among voluntary blood donors, which may have  
130 a limitation to identify associated risk factors. No research was done at Woliso Blood Bank to  
131 determine the prevalence and associated factors. Therefore, the aim of this study is to assess  
132 prevalence and associated factors of transfusion transmittable infections among blood donors at  
133 Woliso Blood Bank of South West Shewa Zone, Oromia Region, Ethiopia, 2021.

## 134 **Materials and Methods**

### 135 **Study setting, design, and period**

136 An institutional-based cross-sectional study was conducted at Woliso Blood Bank in Southwest  
137 Shewa. It is one of the 20 zones in Oromia Regional State, located 114 kilometers from Addis  
138 Ababa, the country's capital city. Woliso Blood Bank is a government organization that was  
139 founded in 2013 by the Oromia regional health bureau in partnership with the FMOH to promote  
140 voluntary, non-remunerated blood donation and blood collection. It aims to serve all populations  
141 of 5,561,976 (S/W/Shewa 1,110,112, N/Shewa 1,450,525, W/Shewa 2,381,072, and  
142 Orom/F/esp./zone 620,267) by preventing morbidity and death from blood shortages by  
143 supplying safe and adequate blood on a timely and free basis depending on hospital demand.  
144 Currently, 14 hospitals get blood from the blood bank on a regular basis (5). The study was  
145 conducted from November 1-30, 2021.

### 146 **Source of Population and Study Population**

147 All volunteer blood donors in Woliso town and catchment district were the source population,  
148 and all volunteer blood donors whose age was between 18 and 65 years were the study  
149 population.

### 150 **Inclusion criteria and Exclusion criteria**

151 Blood donors with an age of greater than or equal to 18 and less than 65 years with good health  
152 were included in the study. Additionally, donors after three months with a weight greater than 48  
153 kg and volunteer blood donors who signed consent were included in the study, and participants  
154 who were not willing to participate in the study during data collection and those with nausea,  
155 vomiting, headache, and discomfort were excluded from the study.

156

157

## 158 **Sample Size Determination**

159 The required sample size (n) for objective one was calculated using a single population  
160 proportion formula with a 95% CI, 3% margin of error, and prevalence of similar studies (12).

$$161 \quad n = p (1-p) / d^2$$

$$162 \quad n = 3.8416 * 0.0676 / 0.0009 = 288$$

163 Taking 10% non-response, the final sample size was  $0.1 * 288 + 288 = 317$ .

164 The sample size of the second objective was smaller than the first objective. Therefore, the final  
165 sample size by taking 10% non-response was **317**.

## 166 **Sampling Procedure/Technique**

167 A systematic sampling technique was used among volunteer blood donors in the blood bank who  
168 met the facility's donation criteria. Using the blood donor database, a sampling frame was built.  
169 The blood bank receives an average of 900 blood donations every month. After calculating the k  
170 value, a random beginning point was chosen using the lottery method. The following formula is  
171 used to determine the sampling interval:  $K=N/n$ , where N is the population size (total numbers of  
172 collections in the blood bank during data collection time, which is 900), n is the calculated  
173 sample size (317), and k is 3. Using this method, each individual in the population had a known  
174 and equal chance of being chosen.

## 175 **Data Collection Method**

### 176 **Data Collectors and Supervisors**

177 Based on their experience with data collection and supervision, three health professional data  
178 collectors and one supervisor were assigned.

179

180

181 **Data collection instruments**

182 The structured questionnaire was adapted from studies conducted before this study (12,16,20)  
183 and modified in context. The questionnaire was prepared in English, translated into Afan Oromo  
184 for data collection, and then re-translated back to English to check its consistency. It consists of  
185 two sections comprising information on the socio-demographic characteristics of the study  
186 participants and their exposure to various risk factors.

187 **Study Variables**

188 **Dependent variable:**

189 Transfusion transmissible infections

190 **Independent variables:**

- 191 • Sociodemographic characteristics include age, sex, marital status, education, and  
192 occupation; behavioral factors include multiple sexual partners, therapeutic drug injection,  
193 alcohol use, cigarette smoking, and chat chewing; clinical factors include previous  
194 transfusion, surgery, and health service-related factors; previous donation and post-  
195 donation counseling; previous exposure to a sharp injury (cut); history of tooth extraction;  
196 and history of blood contact.

197 **Operational definitions**

198 **Voluntary non-remunerated blood donors** were blood donors who gave blood voluntarily  
199 without any payment and not for their own family.

200 **Replacement donors:** donors of blood who replace used blood by their relatives or friends from  
201 blood bank stocks

202 **Donor screening criteria:** Physical and clinical assessment criteria used to accept or reject a  
203 blood donor



204 **Transfusion-transmitted infection:** blood-borne infections that may be transmitted during the  
205 blood transfusion process (human immunodeficiency virus, hepatitis B virus, hepatitis C virus,  
206 and syphilis).

207 **Positive for TTIS:** If the donor samples contain one or more TTIs (the donor sample should be  
208 positive for TTIS two times by ELISA test).

## 209 **Data quality control**

210 To assure the quality of the data, a one-day training was given to supervisors and data collectors  
211 by the principal investigator on the data collection tool. Pre-testing was conducted outside the  
212 study area on 5% of the sample size before data collection in the same area of the study, and  
213 some amendments were made based on the pre-test findings. The questionnaire was checked  
214 daily for accuracy, consistency, and completeness by the supervisor. Furthermore, the supervisor  
215 gave feedback and corrections regarding the collected data on a daily basis to the data collectors.  
216 Standard operating procedures were strictly followed for TTI screening. For quality assurance,  
217 all TTI-positive samples and 10% of the negative samples were collected to be blindly re-  
218 examined by other laboratory technologists.

## 219 **Data Processing and Analysis**

220 Data was entered into Epi Data version 3.1, and it was exported to STATA version 17.0 for data  
221 cleaning and analysis. The study participant's socio-demographic characteristics were described  
222 by descriptive statistics, and the results were presented using a frequency table. A bivariable  
223 logistic regression analysis was used to examine the determinants of TTI, and a p-value below  
224 0.25 was entered into the multivariable logistic regression model. Multivariable logistic  
225 regression analysis was used to examine the association between the determinant variables of  
226 TTI. A p-value of less than 0.05 in multivariable logistic regression analysis was considered  
227 statistical significance. Both crude and adjusted odds ratios were presented with a 95%  
228 confidence interval. Hosmer Leme show goodness-of-fit was used to test for model fitness.

229

## 230 **Ethics approval and consent to participate**

231 The ethical approval and clearance were obtained from the Ambo University College of  
232 Medicine and Health Science research and ethical review committee. In addition to that,  
233 informed, voluntary, written, and signed consent was obtained from each study participant after a  
234 brief explanation of the objective of the study, which assures that participation was voluntary.  
235 The participant was informed that questionnaires were confidential and that they had the right to  
236 refuse to respond to the questionnaire or participate in the study at any time they wanted. Post-  
237 donation counseling was given to those positive donors in a confidential manner. Finally, the test  
238 result was kept in soft copy using Pass Word as well as in hard copy by locking it at Woliso  
239 Blood Laboratory.

## 240 **Results**

### 241 **Socio-demographic factors**

242 Three hundred seventeen voluntary blood donors participated in this study from 317 sampled  
243 participants, with a 100 percent response rate. The study consisted of 230 (72.6%) males and 87  
244 (27.4%) females. The mean ( $\pm$  standard deviation) age of the participants was 28.40 ( $\pm$  9.34)  
245 years. The majority of study participants (98.1%) were urban dwellers and around two-fifths  
246 (46.1%) were students. Around half (48.3%) of the participants donated blood for the first time  
247 (**Table 1**)

248

### 249 **Clinical and behavioural characteristics of study participants**

250 Among the study participants, around 4.1% had received blood products, and around 1.9% were exposed  
251 to unsafe injections. Tooth extraction, post-donation counseling, had sex, history of STD in family, and  
252 unprotected sex habit were found in 10.4%, 21.8%, 53.3%, 10.4%, and 14.8% of the study participants,  
253 respectively. (**Table 2**)

254

255

256

## 257 **Sero-prevalence of HIV, HBV, HCV and syphilis among voluntary** 258 **blood donors**

259 The overall sero-prevalence of transfusion-transmissible infections (the proportion of voluntary  
260 blood donors with at least one transfusion-transmissible infection marker) was 9.5% (95% CI:  
261 6.3, 12.9). The prevalence of HBV, syphilis, HIV, and HCV was 5.05% (95% CI: 3.0, 7.0),  
262 3.15% (95% CI: 1.0, 5.0), 0.63% (95% CI: 0.0, 2.0), and 0.63% (95% CI: 0.0, 2.0), respectively.  
263 In this study, co-infections were not detected in all study participants. (Fig 1)

## 264 **Factors associated with transfusion transmittable infections**

265 A binary logistic regression analysis was used to examine the associated factors of transfusion-  
266 transmissible infections. Variables with a p-value below 0.25 at bivariable logistic regression  
267 analysis were entered into the multivariable logistic regression model. Accordingly, in the crude  
268 analysis, older age, participants without formal education, hearing information about transfusion  
269 transmissible infections, knowing how transfusion transmissible infections transmit, first-time  
270 donation, receiving blood products, having sex, unprotected sexual intercourse with more  
271 partners, and history of STDs were significantly associated with transfusion transmissible  
272 infections.

273 Then multivariable logistic regression analysis was used to identify independent predictors for  
274 transfusion-transmitted infections and to declare statistical significance at a p-value less than  
275 0.05. Thus, unprotected sexual intercourse with more partners is 4.77 times (AOR = 4.77; 95%  
276 CI: 1.38–16.44;  $P < 0.013$ ) more likely to develop a transfusion transmissible infection as  
277 compared to those who have not had unprotected sexual intercourse with more partners.

278 Participants with the first donation were statistically significant predictors of transfusion  
279 transmissible infections, in which the odds of having one transfusion transmissible infection  
280 among study participants were increased by a factor of 2.85 (AOR = 2.85; 95%CI: 1.16–6.99;  
281  $P < 0.022$ ) as compared to those who donated repeatedly. The odds of having one transfusion  
282 transmissible infection among participants with no formal education were 4.84 times (AOR =

283 4.84; 95% CI: 1.09–21.46; P<0.038) higher than those of persons who learned secondary and  
284 above. (Table 3)

## 285 Discussion

286 In this study, the overall sero-prevalence of transfusion-transmitted infections was 9.5% (95%  
287 CI: 6.3–12.9). It was similar to the study conducted at Yemen's national blood transfusion and  
288 research center in Sana'a (8.8% (95% CI: 5.79–11.81) (16), the study in Tanzania (10.1% (95%  
289 CI: 9.92–10.28) (17), the Sidama region of Ethiopia (7.29% (95% CI: 4.69–9.89) (12) and  
290 Eastern Ethiopia (12.4% (95% CI: 9.5–15.3) (20). However, it was higher than another study  
291 conducted in Northern Ethiopia, which was 6% (95% CI: 5.75–6.25) (21) and Harar blood  
292 bank of Eastern Ethiopia, 6.6% (95% CI: 6.14–7.06) (22) and lower than reports from Kenya,  
293 14.1% (95% CI: 11.3–16.9) (18). These variations might be due to differences in the study  
294 population, study setting, and sample size they used to estimate the prevalence.

295 The sero-prevalence of HBV in this study was 5.05% (95% CI: 2.65, 7.45). This finding was  
296 similar to the study conducted in Tanzania (5.1% (95% CI: 4.97, 5.23) (17), the Regional Blood  
297 Transfusion Center Nakuru and Tenwek Mission Hospital of Kenya (6.0% (95% CI: 4.1, 7.9)  
298 (18), Eastern Ethiopia (6.6% (95% CI: 4.42, 8.78) (20), and the Sidama Region of Ethiopia  
299 (4.2% (95% CI: 2.2, 6.2) (12). However, this finding was higher than the previous systematic  
300 review reports from Pakistan 2.04% (95% CI: 0.81, 4.22) (15), Yemen's national blood  
301 transfusion and research center in Sana'a 2.5% (95% CI: 0.84, 4.16) (16), and Harar blood bank  
302 of Eastern Ethiopia 4.4% (95% CI: 4.02, 4.78) (22), and lower than the study result from Bahir  
303 Dar district blood bank of Northwest Ethiopia 6.0% (95% CI: 5.75, 6.25) (21). The possible  
304 explanation for these variations could be due to behavioral characteristics such as unprotected  
305 sex, tooth extraction, and tattoos, which were high in these study participants. Also, HBV has a  
306 high prevalence in the general population, which arises from the high infectivity potential of the  
307 virus.

308 In this study, the sero-prevalence of syphilis was 3.15% (95% CI: 1.25, 5.05). This result was  
309 similar to studies conducted in Eastern Ethiopia (3.4%; 95% CI: 1.8–5.0) (20). However, it was  
310 higher as compared with other studies conducted in Kenya 2.0% (95% CI: 0.87, 3.13) (18),

311 Sidama Region of Ethiopia 0.8% (95% CI: 0.0, 1.6) (12), Harar blood bank of Eastern Ethiopia  
312 1.1% (95% CI: 0.91, 1.29) (22), Northern Ethiopia 1.2% (95% CI: 1.10, 1.30) (21) and Yemen's  
313 national blood transfusion and research center in Sana'a 1.2% (95% CI: 0.00, 2.4) (16). The  
314 lower rate of sero-prevalence of syphilis in most studies might be due to the conceivable fact that  
315 syphilis is less often transmitted by blood. The duration of the study and the cultural and  
316 behavioral characteristics of the study participant might be some of the possible explanations.

317 The voluntary blood donors sero-prevalence of HIV in this study was 0.63%. This finding was  
318 similar to a study conducted in the Harar blood bank of Eastern Ethiopia (0.6% (95% CI: 0.46,  
319 0.74) (22), the Sidama Region of Ethiopia (1.6% (95% CI: 0.4, 2.8) (12) and Eastern Ethiopia  
320 (1.4% (95% CI: 0.37, 2.43) (20). But it was lower than reports from Kenya (9.0% (95% CI: 6.7,  
321 11.3) (18), and higher than study results from Yemen's national blood transfusion and research  
322 center in Sana'a (0.3% (95% CI: 0.0, 0.6) (16) and Northern Ethiopia (0.5% (95% CI: 0.43, 0.57)  
323 (21). These discrepancies might be due to the behavioral characteristics of the study participants  
324 with different study areas and sample sizes.

325 In this study, the sero-prevalence of HCV was 0.63%. This finding was similar to the study  
326 conducted in Yemen's national blood transfusion and research center in Sana'a: 1.2% (95% CI:  
327 0.0, 2.4) (16), in eastern Ethiopia: 1.0% (95% CI: 0.13, 1.87) (20), in northern Ethiopia: 0.6%  
328 (95% CI: 0.52, 0.68) (21), and in the Sidama Region of Ethiopia: 0.5% (95% CI: 0.0, 1.0) (12).  
329 However, it was lower than reports from Kenya (8.0% (95% CI: 5.82, 10.18) (18), and the Harar  
330 blood bank of Eastern Ethiopia (0.8% (95% CI: 0.64, 0.96) (22). The possible reason might be  
331 due to the behavioral characteristics of the study participants with different study areas and  
332 sample sizes.

333 In this study, the odds of developing one of the TTIs were 4.85 [AOR = 4.85; 95% CI: 1.42,  
334 16.54] times higher among voluntary blood donors with no formal education compared to those  
335 learned secondary and above. This finding is comparable with the study done in Eastern Ethiopia  
336 (20). The sero-prevalence of TTIs in this study was found to decrease with an increasing level of  
337 education. This might be attributed to the fact that as the level of education increases, there is a  
338 high probability of being aware of preventive measures against TTIs.

339 The study also showed that the odds of developing one of the TTIs were 4.77 [AOR = 4.77; 95%  
340 CI: 1.38, 16.44] among voluntary blood donors who had unprotected sexual intercourse  
341 compared to those who did not practice unprotected sex. This corresponds with research  
342 conducted in Eastern Ethiopia, Kenya, and South Gonder of Ethiopia (20) (25) and (26)  
343 respectively. The possible explanation could be that sexual activity with multiple partners is the  
344 key mode of acquiring sexually transmitted infections.

345 The study also showed that the odds of developing one of the TTIs were 2.85 [AOR = 2.85; 95%  
346 CI: 1.16, 6.99] times higher among individuals who donated for the first time compared to those  
347 who had donated repeatedly. This finding was supported by the findings of a cross-sectional  
348 study conducted in the South Gondar District Blood Bank, Northwest Ethiopia (26). The reason  
349 might be due to obtaining awareness about TTIs from post-blood donation counseling while  
350 participating repeatedly in such activities.

## 351 **Conclusion**

352 The prevalence of at least one transfusion-transmissible infection in this study was relatively  
353 high as compared to studies conducted earlier in Ethiopia. Also, the study identified determinants  
354 of TTIs among voluntary blood donors based on socio-demographic, clinical, and behavioral  
355 characteristics. Finally, educational level, number of donations, and unprotected sexual  
356 intercourse with more partners were found to be independent predictors for one of the TTIs.

## 357 **Recommendation**

358 Special attention need to be given to transfusion transmissible infections particularly, HBV and  
359 syphilis infections in Southwest Shewa of Oromia Region, Ethiopia. National blood bank should  
360 work in collaboration with different stakeholders and all others district blood banks in  
361 strengthening a screening plan and post donation counselling strategies for monitoring the  
362 implementation at all levels to reduce TTIs. Further prospective studies should be conducted  
363 rigorously in order to identify the cause and effect relationship of TTIs with its contributing  
364 factors. Additionally, each of the blood banks and Regional health bureaus in the study area  
365 should mobilize community for increasing repeated voluntary donors and enhance health

366 promotion about prevention and control transmission transmissible infections by considering the  
367 identified associated factors.

## 368 **Strengths and limitations of the study**

369 This study was intended to assess the prevalence of transfusion-transmissible infections with  
370 highly specific and sensitive laboratory methods. The methodological parts need particular  
371 attention because this study was limited by its cross-sectional study design, in which the  
372 temporal relationship between risk factors and the outcome could not be determined due to both  
373 being examined at the same time.

## 374 **Abbreviations**

375 CI: Confidence Interval; ELISA: Enzyme Linked Immune Sorbent Assay; ETB: Ethiopian Birr;  
376 EU: European Union; FMOH: Federal Ministry of Health; HBV: Hepatitis B Virus; HBsAg:  
377 Hepatitis B Surface Antigen; HCV: Hepatitis C Virus; HIV: Human Immunodeficiency Virus;  
378 NBB: National Blood Bank; STD: Sexually Transmitted Disease; TTIs: Transfusion  
379 Transmissible Infections; WHO: World Health Organization

## 380 **Data availability**

381 The data used to support the findings of this study are available from the corresponding author  
382 upon request.

## 383 **Funding**

384 This study was supported by Ambo University.

## 385 **Disclosure**

386 This paper is based on the thesis of Samuel Demissie, Behailu Hawulte, Teshome Demis  
387 Nimani, Sisay Dabi, Alemnesh W/Amlak, Habtamu Oljira, and Belay Tafa. It has been published  
388 on the institutional website.

389

## 390 **Competing Interests**

391 The authors declare that they have no known competing financial interests or personal  
392 relationships that could have appeared to influence the work reported in this paper.

## 393 **Contributions of author's**

394 All authors made a significant contribution to the work reported, whether that is in the  
395 conception, study design, execution, acquisition of data, analysis, and interpretation, or in all  
396 these areas; took part in drafting, revising, or critically reviewing the article; gave final approval  
397 of the version to be published; have agreed on the journal to which the article has been  
398 submitted; and agree to be accountable for all aspects of the work.

## 399 **Acknowledgments**

400 We would like to express our gratitude to the Ambo University College of Medicine and Health  
401 Sciences Department of Public Health for giving us the opportunity to prepare this research.  
402 Finally, we would like to express our appreciation to the study participants for their willingness  
403 to provide the required information, data collectors, supervisors, and Woliso Blood Bank staff.

## 404 **Reference**

- 405
- 406 1. World Health Organization. Strategic framework for blood safety and availability 2016–  
407 2025. WHO Reg Off East Mediterr. 2017;1–39.
  - 408 2. Cells RB. 334401\_Compndium\_V04Jan2021\_Bookmarkedworking\_Rwv01.  
409 2021;(January).
  - 410 3. Every I, Surgery PC, Medical T, Surgery PC, Medical T, Technologies EH. Blood  
411 transfusion safety. :1–6.
  - 412 4. Organization WH, All. Universal Access to Safe Blood Transfusion Universal Access to  
413 Safe Blood Transfusion. 2010;



- 414 5. Woliso BB.
- 415 6. WHO. NATIONAL GUIDELINES ON SCREENING DONATED BLOOD FOR TTIs.  
416 2013;1. Available from: [http://www.rcdc.gov.bt/web/wp-](http://www.rcdc.gov.bt/web/wp-content/uploads/2015/07/NATIONAL-GUIDELINES-ON-SCREENING-BLOOD-FOR-TTIs.pdf)  
417 [content/uploads/2015/07/NATIONAL-GUIDELINES-ON-SCREENING-BLOOD-FOR-](http://www.rcdc.gov.bt/web/wp-content/uploads/2015/07/NATIONAL-GUIDELINES-ON-SCREENING-BLOOD-FOR-TTIs.pdf)  
418 [TTIs.pdf](http://www.rcdc.gov.bt/web/wp-content/uploads/2015/07/NATIONAL-GUIDELINES-ON-SCREENING-BLOOD-FOR-TTIs.pdf)
- 419 7. Gebregziabher H, Meshasha M, Cerna P. Predicting the Seroprevalence of HBV , HCV ,  
420 and HIV Based on National Blood of Addis Ababa Ethiopia Using Data Mining  
421 Technologys. 2017;1(1):44–55.
- 422 8. Ataro Z, Urgessa F, Wasihun T. Prevalence and Trends of Major Transfusion  
423 Transmissible Infections among Blood Donors in Dire Dawa Blood bank, Eastern  
424 Ethiopia: Retrospective Study. *Ethiop J Health Sci.* 2018;28(6):701–10.
- 425 9. Bloch EM, Vermeulen M, Murphy E. Blood Transfusion Safety in Africa: A Literature  
426 Review of Infectious Disease and Organizational Challenges. *Transfus Med Rev.*  
427 2012;26(2):164–80.
- 428 10. Alqahtani SM, Alsagaby SA, Mir SA, Alaidarous M, Dukhyil A Bin, Alshehri B, et al.  
429 Seroprevalence of Viral Hepatitis B and C among Blood Donors in the Northern Region  
430 of Riyadh Province , Saudi Arabia. 2021;1–11.
- 431 11. Sonderup MW, Afihene M, Ally R, Apica B, Awuku Y, Cunha L, et al. Hepatitis C in  
432 sub-Saharan Africa: the current status and recommendations for achieving elimination by  
433 2030. *Lancet Gastroenterol Hepatol* [Internet]. 2017;2(12):910–9. Available from:  
434 [http://dx.doi.org/10.1016/S2468-1253\(17\)30249-2](http://dx.doi.org/10.1016/S2468-1253(17)30249-2)
- 435 12. Bonja F, Hussein M, Alemu J, Gemechu D, Birhaneselassie M. The prevalence of  
436 transfusion transmitted infections : A focus on hepatitis B virus among blood donors at.  
437 2017;7:7–14.
- 438 13. Organization WH. Global status Report on Blood Safety and Availability. 2016;
- 439 14. Abdella S, Berheto TM, Tolera G, Belete W, Deressa T, Feleke A, et al. Sero-prevalence  
440 of transfusion transmittable infections: HIV, Hepatitis B, C and *Treponema pallidum* and  
441 associated factors among blood donors in Ethiopia: A retrospective study. *PLoS One*

- 442 [Internet]. 2020;15(10 October):1–13. Available from:  
443 <http://dx.doi.org/10.1371/journal.pone.0241086>
- 444 15. Sana MK. A Systematic Review of Transfusion-Transmissible Infections Among Blood  
445 Donors and Associated Safety Challenges in Pakistan. 2020;405–20.
- 446 16. Ya G, Az A, Ma A, Ma A, Aa A. Transfusion Transmitted Infections : Prevalence and  
447 Associated Factors , National Blood Transfusion and Research Center , Sana ' a Capital ,  
448 Yemen. 2021;1–7.
- 449 17. Mremi A, Yahaya JJ, Nyindo M, Mollel E. Transfusion-Transmitted Infections and  
450 associated risk factors at the Northern Zone Blood Transfusion Center in Tanzania: A  
451 study of blood donors between 2017 and 2019. PLoS One [Internet]. 2021;16(3 March):1–  
452 12. Available from: <http://dx.doi.org/10.1371/journal.pone.0249061>
- 453 18. Bartonjo G, Oundo J, Ng'ang'a Z. Prevalence and associated risk factors of transfusion  
454 transmissible infections among blood donors at regional blood transfusion center nakuru  
455 and tenwek mission hospital, Kenya. Pan Afr Med J. 2019;34:1–13.
- 456 19. Siraj N, Achila OO, Issac J, Menghisteb E, Hailemariam M, Hagos S, et al.  
457 Seroprevalence of transfusion-transmissible infections among blood donors at National  
458 Blood Transfusion Service , Eritrea : a seven- year retrospective study. 2018;1–9.
- 459 20. Heyredin I, Mengistie B, Weldegebreal F. Sero-prevalence of transfusion-transmittable  
460 infections and associated factors among blood donors in Eastern Ethiopia: an Institutional-  
461 based cross-sectional study. SAGE Open Med. 2019;7:205031211983446.
- 462 21. Shiferaw E, Tadilo W, Melkie I, Shiferaw M. Sero-prevalence and trends of  
463 transfusiontransmissible infections among blood donors at Bahir Dar district blood bank,  
464 northwest Ethiopia: A four year retrospective study. PLoS One. 2019;14(4):1–13.
- 465 22. Teklemariam Z, Mitiku H, Weldegebreal F. Seroprevalence and trends of transfusion  
466 transmitted infections at Harar blood bank in Harari regional state , Eastern Ethiopia :  
467 eight years retrospective study. 2018;1–8.
- 468 23. Shaikh M, Bhople KS. Seroprevalence of Transfusion Transmitted Infections in blood  
469 donors at a rural based tertiary care teaching hospital in India. 2015;14(10):29–32.

- 470 24. Farshadpour F, Taherkhani R, Tajbakhsh S, Gholizadeh M. Prevalence and Trends of  
471 Transfusion- Transmissible Viral Infections among Blood Donors in South of Iran : An  
472 Eleven-Year Retrospective Study. 2016;2014:1–18.
- 473 25. Awili HO, Gitao GC, Muchemi GM. Seroprevalence and Risk Factors for Hepatitis B  
474 Virus Infection in Adolescent Blood Donors within Selected Counties of Western Kenya.  
475 Biomed Res Int. 2020;2020.
- 476 26. Negash M, Ayalew M, Geremew D, Workineh M. Seroprevalence and associated risk  
477 factors for HIV, Hepatitis B and C among blood Donors in South Gondar District blood  
478 Bank, Northwest Ethiopia. BMC Infect Dis. 2019;19(1):1–10.
- 479 27. Policies E, Information A, Guidelines PR, Outlook O, Statistics AA, Published P, et al.  
480 Prevalence of Hepatitis B Virus and Hepatitis C Virus Among Blood Donors in Nekemte  
481 Blood Bank , Western Oromia , Ethiopia : Retrospective 5 Years Study.

482

483

484

485

486

487

488

489

490

491

492 Table 1 Socio-demographic characteristics of voluntary blood donors at Woliso Blood Bank of  
 493 South West Shewa, Oromia Region, Ethiopia, 2021.

| <b>Variables</b>    | <b>Categories</b>   | <b>Frequency</b> | <b>Percentage</b> |
|---------------------|---------------------|------------------|-------------------|
| Age category        | 18-24 years         | 136              | 42.9              |
|                     | 25-31 years         | 60               | 18.9              |
|                     | 32-38 years         | 71               | 22.4              |
|                     | 39 and above years  | 50               | 15.8              |
| Gender              | Male                | 230              | 72.6              |
|                     | Female              | 87               | 27.4              |
| Marital status      | Single              | 175              | 55.2              |
|                     | Married             | 134              | 42.3              |
|                     | Divorced            | 6                | 1.9               |
|                     | Widowed             | 2                | 0.6               |
| Residence           | Rural               | 6                | 1.9               |
|                     | Urban               | 311              | 98.1              |
| Educational status  | No formal education | 13               | 4.1               |
|                     | Primary             | 155              | 48.9              |
|                     | Secondary and above | 149              | 47.0              |
| Occupational status | Civil servant       | 125              | 39.4              |
|                     | Daily labor         | 54               | 17.0              |
|                     | Student             | 138              | 43.5              |

494

495

496

497

498 Table 2 Clinical history and behavioral characteristics of voluntary blood donors at Woliso Blood Bank of  
 499 South West Shewa, Oromia Region, Ethiopia, 2021.

| <b>Variables</b>            | <b>Characteristics</b> | <b>Frequency</b> | <b>Percentage</b> |
|-----------------------------|------------------------|------------------|-------------------|
| Received blood product      | Yes                    | 13               | 4.1               |
|                             | No                     | 304              | 95.9              |
| Number of donation          | First time             | 164              | 51.7              |
|                             | Repeatedly             | 153              | 48.3              |
| Use drug                    | Yes                    | 3                | 0.9               |
|                             | No                     | 314              | 99.1              |
| Exposed to unsafe injection | Yes                    | 6                | 1.9               |
|                             | No                     | 311              | 98.1              |
| Tooth extraction            | Yes                    | 33               | 10.4              |
|                             | No                     | 284              | 89.6              |
| Sharing sharps              | Yes                    | 9                | 2.8               |
|                             | No                     | 308              | 97.2              |
| Had sex                     | Yes                    | 169              | 53.3              |
|                             | No                     | 148              | 46.7              |
| Unprotected sex             | Yes                    | 47               | 14.8              |
|                             | No                     | 270              | 85.2              |
| History of STDs             | Yes                    | 33               | 10.4              |
|                             | No                     | 284              | 89.6              |
| Had tattoo                  | Yes                    | 16               | 5.0               |
|                             | No                     | 301              | 95.0              |
| Post donation counseling    | Yes                    | 69               | 21.8              |
|                             | No                     | 248              | 78.2              |
| Heard about TTIs            | Yes                    | 273              | 86.1              |

|                        |     |     |      |
|------------------------|-----|-----|------|
|                        | No  | 44  | 13.9 |
| Know how TTIs transmit | Yes | 272 | 85.8 |
|                        | No  | 45  | 14.2 |
| Drinking alcohol       | Yes | 34  | 10.7 |
|                        | No  | 283 | 89.3 |
| Chewing chat           | Yes | 13  | 4.1  |
|                        | No  | 304 | 95.9 |
| Smoking cigarette      | Yes | 6   | 1.9  |
|                        | No  | 311 | 98.1 |

---

500  
501  
502  
503  
504  
505  
506  
507  
508  
509  
510  
511  
512  
513  
514  
515  
516  
517  
518

519 Table 3 Variables associated with TTIs by both crude and adjusted odds ratio among voluntary blood  
 520 donors at Woliso Blood Bank of South West Shewa, Oromia Region, Ethiopia, 2021.

| Variables                 | TTIs status |            | COR(95%CI)       | AOR(95%CI)       |
|---------------------------|-------------|------------|------------------|------------------|
|                           | Yes N (%)   | No N (%)   |                  |                  |
| <b>Age (Years)</b>        |             |            |                  |                  |
| 18-24                     | 6(1.9)      | 130 (41.0) | 1                | 1                |
| 25-31                     | 5(1.6)      | 55(17.4)   | 1.9(0.58-6.73)   | 2.96(0.48-17.99) |
| 32-38                     | 9(2.8)      | 62(19.6)   | 3.14(1.07-9.23)  | 6.57(0.76-56.78) |
| >=39                      | 10(3.2)     | 40(12.6)   | 5.42(1.85-15.83) | 8.08(0.86-75.42) |
| <b>Educational status</b> |             |            |                  |                  |
| No formal edu.            | 5(1.6)      | 8(2.5)     | 4.85(1.42-16.54) | 4.84(1.09-21.46) |
| Primary                   | 8(2.5)      | 147(46.4)  | 0.42(0.1-1.01)   | 1.42(0.21-9.56)  |
| Secondary &<br>above      | 17(5.4)     | 132(41.6)  | 1                | 1                |
| <b>Heard TTIs</b>         |             |            |                  |                  |
| Yes                       | 22(6.9)     | 252(79.5)  | 1                | 1                |
| No                        | 8(2.5)      | 35(11.0)   | 3.08(1.31-7.27)  | 1.49(0.47-4.75)  |
| <b>Knowhow transmit</b>   |             |            |                  |                  |
| <b>Yes</b>                |             |            |                  |                  |
| No                        | 21(6.6)     | 250(78.9)  | 1                | 1                |
|                           | 9(2.9)      | 37(11.7)   | 2.46(1.01-5.92)  | 1.02(0.33-3.19)  |
| <b>Number of donate</b>   |             |            |                  |                  |
| First time                | 20(6.3)     | 133(42.0)  | 2.31(1.04-5.12)  | 2.85(1.16-6.99)* |

|            |         |           |   |   |
|------------|---------|-----------|---|---|
| Repeatedly | 10(3.2) | 154(48.6) | 1 | 1 |
|------------|---------|-----------|---|---|

**Received blood**

|     |        |        |                  |                    |
|-----|--------|--------|------------------|--------------------|
| Yes | 5(1.5) | 8(2.5) | 4.75(1.36-16.49) | 2.22(0.47-7.10.39) |
|-----|--------|--------|------------------|--------------------|

|    |         |           |   |   |
|----|---------|-----------|---|---|
| No | 26(8.2) | 278(87.7) | 1 | 1 |
|----|---------|-----------|---|---|

**Had sex**

|     |         |           |                 |                 |
|-----|---------|-----------|-----------------|-----------------|
| Yes | 21(6.6) | 148(46.7) | 2.19(0.97-4.95) | 0.47(0.11-2.06) |
|-----|---------|-----------|-----------------|-----------------|

|    |        |           |   |   |
|----|--------|-----------|---|---|
| No | 9(2.8) | 139(43.8) | 1 | 1 |
|----|--------|-----------|---|---|

**Unprotected sex**

|     |         |          |                  |                   |
|-----|---------|----------|------------------|-------------------|
| Yes | 14(4.4) | 33(10.4) | 6.73(3.01-15.04) | 4.77(1.38-16.44)* |
|-----|---------|----------|------------------|-------------------|

|    |         |           |   |   |
|----|---------|-----------|---|---|
| No | 16(5.0) | 254(80.1) | 1 | 1 |
|----|---------|-----------|---|---|

**History of STD**

|     |        |         |                  |                 |
|-----|--------|---------|------------------|-----------------|
| Yes | 9(2.8) | 24(7.6) | 4.69(1.94-11.39) | 1.18(0.34-4.12) |
|-----|--------|---------|------------------|-----------------|

|    |         |           |   |   |
|----|---------|-----------|---|---|
| No | 21(6.6) | 263(83.0) | 1 | 1 |
|----|---------|-----------|---|---|

---

521 **Key:**\* Significant at p-value <0.05; COR: crude odds ratio; AOR: adjusted odds ratio; CI: confidence  
522 interval. Those with p value 0.25 and less than were entered into the multivariate regression; TTI:  
523 transfusion transmissible infection; STD: sexually transmitted disease

---

524

525

526



527

528

529

530

531

532

533

534

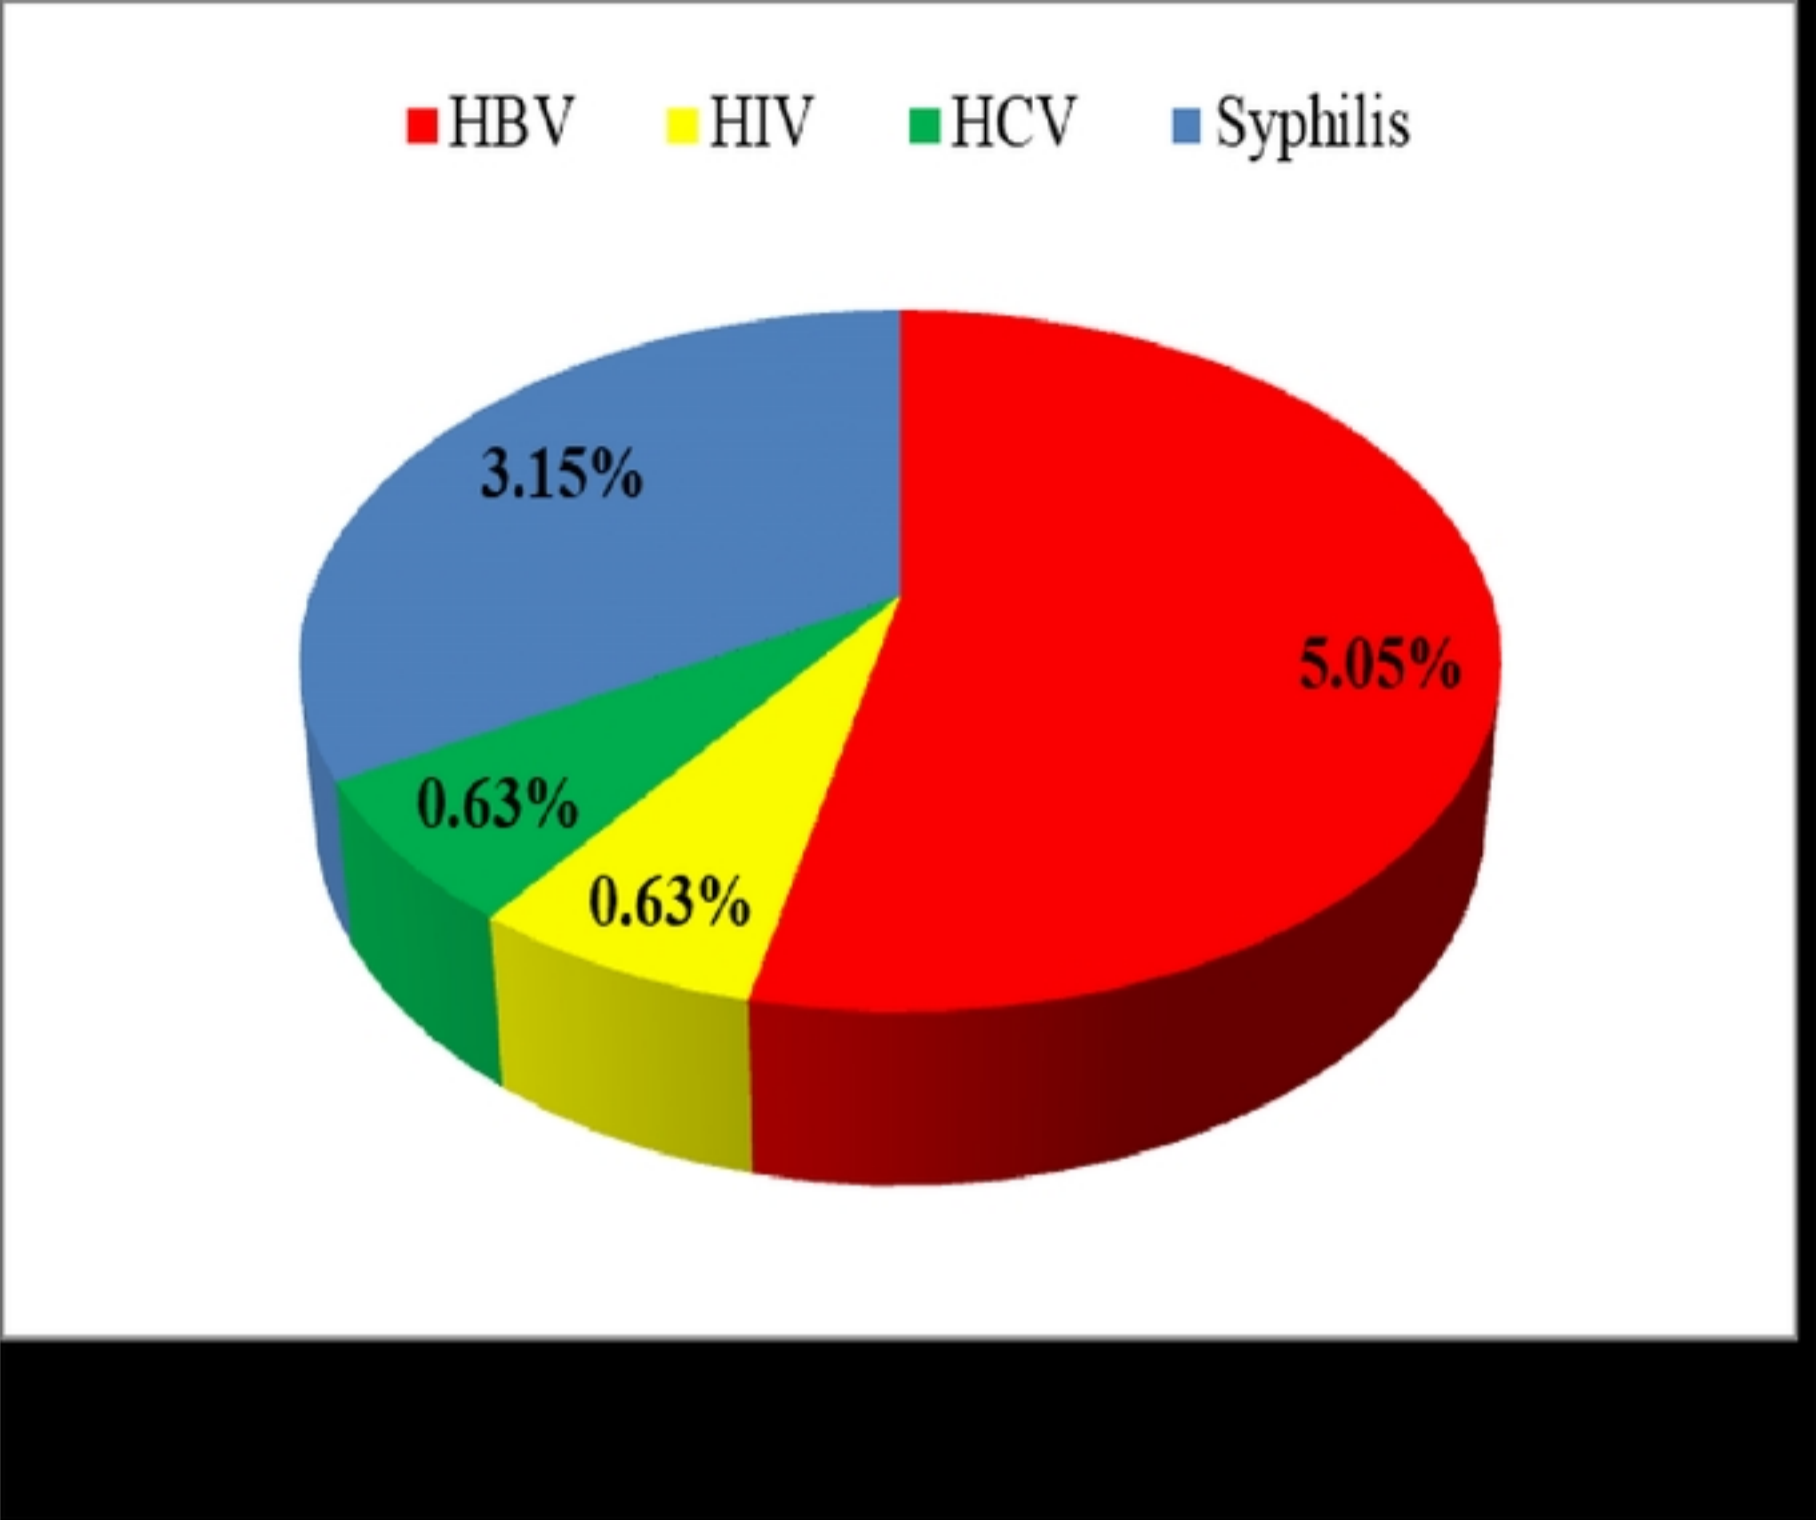

Figure
